# Supplementary material for: A comparison of supraglacial meltwater features throughout contrasting melt seasons: Southwest Greenland
Source: Copernicus journal article supplement (doi:10.5194/egusphere-2024-23), 2024-02-26
Supplement: Supplementary file 1 [file egusphere-2024-23-supplement.pdf]

# Supplement

Table S1: details of all Sentinel 2 (S2) and Landsat 8 (L8) satellite imagery used in this study.

| Scene ID                                                     | Date      | Satellite | Cloud Cover (%) |
|--------------------------------------------------------------|-----------|-----------|-----------------|
| S2A_MSIL1C_20180516T150041_N0206_R125_T22WEV_20180516T170011 | 16-May-18 | S2        | 9.8             |
| S2A_MSIL1C_20180516T150041_N0206_R125_T22WV_20180516T170011  | 16-May-18 | S2        | 87.7            |
| S2A_MSIL1C_20180526T145921_N0206_R125_T22WEV_20180526T201815 | 26-May-18 | S2        | 68.6            |
| S2A_MSIL1C_20180526T145921_N0206_R125_T22WV_20180526T201815  | 26-May-18 | S2        | 60.2            |
| LC08_L1TP_008013_20180605_20200831_02_T1                     | 05-Jun-18 | L8        | 35.4            |
| S2B_MSIL1C_20180610T150009_N0206_R125_T22WEV_20180610T183746 | 10-Jun-18 | S2        | 16.1            |
| S2B_MSIL1C_20180610T150009_N0206_R125_T22WV_20180610T183746  | 10-Jun-18 | S2        | 82.8            |
| S2A_MSIL1C_20180615T145911_N0206_R125_T22WEV_20180615T170226 | 15-Jun-18 | S2        | 34.3            |
| S2A_MSIL1C_20180615T145911_N0206_R125_T22WV_20180615T170226  | 15-Jun-18 | S2        | 43.1            |
| S2A_MSIL1C_20180618T150911_N0206_R025_T22WEV_20180618T185402 | 18-Jun-18 | S2        | 4.9             |
| S2A_MSIL1C_20180618T150911_N0206_R025_T22WV_20180618T185402  | 18-Jun-18 | S2        | 22.6            |
| S2B_MSIL1C_20180703T150909_N0206_R025_T22WEV_20180703T201427 | 03-Jul-18 | S2        | 71.9            |
| S2B_MSIL1C_20180703T150909_N0206_R025_T22WV_20180703T201427  | 03-Jul-18 | S2        | 19.6            |
| LC08_L1TP_008013_20180707_20200831_02_T1                     | 07-Jul-18 | L8        | 31.2            |
| S2B_MSIL1C_20180710T150009_N0206_R125_T22WEV_20180710T202212 | 10-Jul-18 | S2        | 5.0             |
| S2B_MSIL1C_20180710T150009_N0206_R125_T22WV_20180710T202212  | 10-Jul-18 | S2        | 94.5            |
| S2B_MSIL1C_20180713T151139_N0206_R025_T22WEV_20180713T200909 | 13-Jul-18 | S2        | 4.3             |
| S2B_MSIL1C_20180713T151139_N0206_R025_T22WV_20180713T200909  | 13-Jul-18 | S2        | 0.3             |
| S2A_MSIL1C_20180725T145911_N0206_R125_T22WEV_20180725T185310 | 25-Jul-18 | S2        | 89.9            |
| S2A_MSIL1C_20180725T145911_N0206_R125_T22WV_20180725T185310  | 25-Jul-18 | S2        | 25.1            |
| S2B_MSIL1C_20180730T150009_N0206_R125_T22WEV_20180730T202856 | 30-Jul-18 | S2        | 0.1             |
| S2B_MSIL1C_20180730T150009_N0206_R125_T22WV_20180730T202856  | 30-Jul-18 | S2        | 0.2             |
| S2A_MSIL1C_20180810T151911_N0206_R068_T22WEV_20180810T202556 | 10-Aug-18 | S2        | 2.5             |
| S2A_MSIL1C_20180810T151911_N0206_R068_T22WV_20180810T202556  | 10-Aug-18 | S2        | 0.0             |
| S2B_MSIL1C_20180819T145959_N0206_R125_T22WEV_20180819T200111 | 19-Aug-18 | S2        | 26.2            |
| S2B_MSIL1C_20180819T145959_N0206_R125_T22WV_20180819T200111  | 19-Aug-18 | S2        | 9.3             |
| S2A_MSIL1C_20180824T145911_N0206_R125_T22WEV_20180824T190305 | 24-Aug-18 | S2        | 59.8            |

|                                                              |           |    |      |
|--------------------------------------------------------------|-----------|----|------|
| S2A_MSIL1C_20180824T145911_N0206_R125_T22WV_20180824T190305  | 24-Aug-18 | S2 | 65.3 |
| S2A_MSIL1C_20180913T145911_N0206_R125_T22WEV_20180913T171024 | 13-Sep-18 | S2 | 0.0  |
| S2A_MSIL1C_20180913T145911_N0206_R125_T22WV_20180913T171024  | 13-Sep-18 | S2 | 0.0  |
| S2B_MSIL1C_20180918T145959_N0206_R125_T22WEV_20180918T200337 | 18-Sep-18 | S2 | 0.0  |
| S2B_MSIL1C_20180918T145959_N0206_R125_T22WV_20180918T200337  | 18-Sep-18 | S2 | 6.9  |
| S2A_MSIL1C_20180919T151911_N0206_R068_T22WEV_20180919T191221 | 19-Sep-18 | S2 | 17.2 |
| S2A_MSIL1C_20180919T151911_N0206_R068_T22WV_20180919T191221  | 19-Sep-18 | S2 | 0.0  |
| S2B_MSIL1C_20180921T151119_N0206_R025_T22WEV_20180921T201342 | 21-Sep-18 | S2 | 28.2 |
| S2B_MSIL1C_20180921T151119_N0206_R025_T22WV_20180921T201342  | 21-Sep-18 | S2 | 95.4 |
| S2B_MSIL1C_20180924T152029_N0206_R068_T22WEV_20180924T202449 | 24-Sep-18 | S2 | 1.2  |
| S2B_MSIL1C_20180924T152029_N0206_R068_T22WV_20180924T202449  | 24-Sep-18 | S2 | 0.0  |
| S2A_MSIL1C_20190501T145921_N0207_R125_T22WEV_20190501T165756 | 01-May-19 | S2 | 1.6  |
| S2A_MSIL1C_20190501T145921_N0207_R125_T22WV_20190501T165756  | 01-May-19 | S2 | 45.5 |
| S2B_MSIL1C_20190502T151809_N0207_R068_T22WEV_20190502T190011 | 02-May-19 | S2 | 0.0  |
| S2B_MSIL1C_20190502T151809_N0207_R068_T22WV_20190502T190011  | 02-May-19 | S2 | 0.0  |
| S2B_MSIL1C_20190506T150019_N0207_R125_T22WEV_20190506T195836 | 06-May-19 | S2 | 2.4  |
| S2B_MSIL1C_20190506T150019_N0207_R125_T22WV_20190506T195836  | 06-May-19 | S2 | 0.7  |
| LC08_L1TP_008013_20190507_20200828_02_T1                     | 07-May-19 | L8 | 3.8  |
| S2B_MSIL1C_20190509T150809_N0207_R025_T22WEV_20190509T184714 | 09-May-19 | S2 | 0.6  |
| S2B_MSIL1C_20190509T150809_N0207_R025_T22WV_20190509T184714  | 09-May-19 | S2 | 13.4 |
| S2A_MSIL1C_20190517T151911_N0207_R068_T22WEV_20190517T171614 | 17-May-19 | S2 | 29.3 |
| S2A_MSIL1C_20190517T151911_N0207_R068_T22WV_20190517T171614  | 17-May-19 | S2 | 0.0  |
| S2B_MSIL1C_20190519T150809_N0207_R025_T22WEV_20190519T184819 | 19-May-19 | S2 | 6.3  |
| S2B_MSIL1C_20190519T150809_N0207_R025_T22WV_20190519T184819  | 19-May-19 | S2 | 7.9  |
| S2B_MSIL1C_20190522T151919_N0207_R068_T22WEV_20190522T171829 | 22-May-19 | S2 | 0.0  |
| S2B_MSIL1C_20190522T151919_N0207_R068_T22WV_20190522T171829  | 22-May-19 | S2 | 0.0  |
| LC08_L1TP_008013_20190523_20200830_02_T1                     | 23-May-19 | L8 | 4.5  |
| S2A_MSIL1C_20190524T150911_N0207_R025_T22WEV_20190524T170812 | 24-May-19 | S2 | 7.9  |
| S2A_MSIL1C_20190524T150911_N0207_R025_T22WV_20190524T170812  | 24-May-19 | S2 | 17.3 |
| LC08_L1TP_006013_20190525_20200828_02_T1                     | 25-May-19 | L8 | 0.7  |
| S2B_MSIL1C_20190526T150019_N0207_R125_T22WEV_20190526T183734 | 26-May-19 | S2 | 0.6  |
| S2B_MSIL1C_20190526T150019_N0207_R125_T22WV_20190526T183734  | 26-May-19 | S2 | 79.1 |
| S2A_MSIL1C_20190527T151911_N0207_R068_T22WEV_20190527T202622 | 27-May-19 | S2 | 0.1  |
| S2A_MSIL1C_20190527T151911_N0207_R068_T22WV_20190527T202622  | 27-May-19 | S2 | 0.0  |
| S2B_MSIL1C_20190529T150809_N0207_R025_T22WEV_20190529T201431 | 29-May-19 | S2 | 7.6  |

|                                                              |           |    |      |
|--------------------------------------------------------------|-----------|----|------|
| S2B_MSIL1C_20190529T150809_N0207_R025_T22WV_20190529T201431  | 29-May-19 | S2 | 94.1 |
| S2A_MSIL1C_20190531T145921_N0207_R125_T22WEV_20190531T165832 | 31-May-19 | S2 | 3.7  |
| S2A_MSIL1C_20190531T145921_N0207_R125_T22WV_20190531T165832  | 31-May-19 | S2 | 22.6 |
| S2B_MSIL1C_20190601T151809_N0207_R068_T22WEV_20190601T184204 | 01-Jun-19 | S2 | 13.6 |
| S2B_MSIL1C_20190601T151809_N0207_R068_T22WV_20190601T184204  | 01-Jun-19 | S2 | 0.0  |
| S2B_MSIL1C_20190605T150019_N0207_R125_T22WEV_20190605T200407 | 05-Jun-19 | S2 | 10.1 |
| S2B_MSIL1C_20190605T150019_N0207_R125_T22WV_20190605T200407  | 05-Jun-19 | S2 | 94.0 |
| S2B_MSIL1C_20190608T150809_N0207_R025_T22WEV_20190608T184815 | 08-Jun-19 | S2 | 10.1 |
| S2B_MSIL1C_20190608T150809_N0207_R025_T22WV_20190608T184815  | 08-Jun-19 | S2 | 14.1 |
| LC08_L1TP_006013_20190610_20200828_02_T1                     | 10-Jun-19 | L8 | 1.2  |
| S2A_MSIL1C_20190613T150911_N0207_R025_T22WEV_20190613T170639 | 13-Jun-19 | S2 | 52.6 |
| S2A_MSIL1C_20190613T150911_N0207_R025_T22WV_20190613T170639  | 13-Jun-19 | S2 | 0.9  |
| LC08_L1TP_007013_20190617_20200828_02_T1                     | 17-Jun-19 | L8 | 10.5 |
| S2A_MSIL1C_20190620T145921_N0207_R125_T22WEV_20190620T183937 | 20-Jun-19 | S2 | 0.1  |
| S2A_MSIL1C_20190620T145921_N0207_R125_T22WV_20190620T183937  | 20-Jun-19 | S2 | 0.0  |
| S2A_MSIL1C_20190703T150921_N0207_R025_T22WEV_20190703T184907 | 03-Jul-19 | S2 | 13.9 |
| S2A_MSIL1C_20190703T150921_N0207_R025_T22WV_20190703T184907  | 03-Jul-19 | S2 | 31.8 |
| S2A_MSIL1C_20190707T144921_N0207_R082_T22WEV_20190707T164746 | 07-Jul-19 | S2 | 23.2 |
| S2A_MSIL1C_20190707T144921_N0207_R082_T22WV_20190707T164746  | 07-Jul-19 | S2 | 3.8  |
| S2B_MSIL1C_20190708T150809_N0208_R025_T22WEV_20190708T185223 | 08-Jul-19 | S2 | 0.0  |
| S2B_MSIL1C_20190708T150809_N0208_R025_T22WV_20190708T185223  | 08-Jul-19 | S2 | 0.1  |
| S2B_MSIL1C_20190712T144759_N0208_R082_T22WEV_20190712T164159 | 12-Jul-19 | S2 | 0.0  |
| S2B_MSIL1C_20190712T144759_N0208_R082_T22WV_20190712T164159  | 12-Jul-19 | S2 | 0.0  |
| S2B_MSIL1C_20190715T150019_N0208_R125_T22WEV_20190715T200825 | 15-Jul-19 | S2 | 0.3  |
| S2B_MSIL1C_20190715T150019_N0208_R125_T22WV_20190715T200825  | 15-Jul-19 | S2 | 5.9  |
| S2B_MSIL1C_20190725T150019_N0208_R125_T22WEV_20190725T183725 | 25-Jul-19 | S2 | 21.1 |
| S2B_MSIL1C_20190725T150019_N0208_R125_T22WV_20190725T183725  | 25-Jul-19 | S2 | 0.8  |
| S2B_MSIL1C_20190801T144759_N0208_R082_T22WEV_20190801T164915 | 01-Aug-19 | S2 | 0.0  |
| S2B_MSIL1C_20190801T144759_N0208_R082_T22WV_20190801T164915  | 01-Aug-19 | S2 | 1.8  |
| S2A_MSIL1C_20190802T150921_N0208_R025_T22WEV_20190802T170710 | 02-Aug-19 | S2 | 0.0  |
| S2A_MSIL1C_20190802T150921_N0208_R025_T22WV_20190802T170710  | 02-Aug-19 | S2 | 7.3  |
| S2B_MSIL1C_20190804T150019_N0208_R125_T22WEV_20190804T165643 | 04-Aug-19 | S2 | 4.2  |
| S2B_MSIL1C_20190804T150019_N0208_R125_T22WV_20190804T165643  | 04-Aug-19 | S2 | 17.7 |
| S2A_MSIL1C_20190809T145921_N0208_R125_T22WEV_20190809T165708 | 09-Aug-19 | S2 | 0.6  |
| S2A_MSIL1C_20190809T145921_N0208_R125_T22WV_20190809T165708  | 09-Aug-19 | S2 | 0.0  |

|                                                              |           |    |      |
|--------------------------------------------------------------|-----------|----|------|
| S2B_MSIL1C_20190811T144759_N0208_R082_T22WEV_20190811T164246 | 11-Aug-19 | S2 | 0.0  |
| S2B_MSIL1C_20190811T144759_N0208_R082_T22WFV_20190811T164246 | 11-Aug-19 | S2 | 0.0  |
| S2A_MSIL1C_20190812T150921_N0208_R025_T22WEV_20190812T201743 | 12-Aug-19 | S2 | 0.0  |
| S2A_MSIL1C_20190812T150921_N0208_R025_T22WFV_20190812T201743 | 12-Aug-19 | S2 | 11.3 |
| S2B_MSIL1C_20190817T150809_N0208_R025_T22WEV_20190817T202054 | 17-Aug-19 | S2 | 52.7 |
| S2B_MSIL1C_20190817T150809_N0208_R025_T22WFV_20190817T202054 | 17-Aug-19 | S2 | 16.4 |
| LC08_L1TP_007013_20190820_20200827_02_T1                     | 20-Aug-19 | L8 | 11.1 |
| S2B_MSIL1C_20190824T150009_N0208_R125_T22WEV_20190824T201004 | 24-Aug-19 | S2 | 5.2  |
| S2B_MSIL1C_20190824T150009_N0208_R125_T22WFV_20190824T201004 | 24-Aug-19 | S2 | 27.8 |
| S2A_MSIL1C_20190825T151911_N0208_R068_T22WEV_20190825T185502 | 25-Aug-19 | S2 | 3.4  |
| S2A_MSIL1C_20190825T151911_N0208_R068_T22WFV_20190825T185502 | 25-Aug-19 | S2 | 0.0  |
| LC08_L1TP_008013_20190827_20200826_02_T1                     | 27-Aug-19 | L8 | 42.5 |
| S2A_MSIL1C_20190829T145921_N0208_R125_T22WEV_20190829T183408 | 29-Aug-19 | S2 | 11.2 |
| S2A_MSIL1C_20190829T145921_N0208_R125_T22WFV_20190829T183408 | 29-Aug-19 | S2 | 99.5 |
| S2B_MSIL1C_20190830T151809_N0208_R068_T22WEV_20190830T185641 | 30-Aug-19 | S2 | 33.3 |
| S2A_MSIL1C_20190901T150911_N0208_R025_T22WEV_20190901T170819 | 01-Sep-19 | S2 | 34.5 |
| S2A_MSIL1C_20190901T150911_N0208_R025_T22WFV_20190901T170819 | 01-Sep-19 | S2 | 24.2 |
| S2B_MSIL1C_20190909T151809_N0208_R068_T22WEV_20190909T202539 | 09-Sep-19 | S2 | 14.6 |
| S2A_MSIL1C_20190918T150011_N0208_R125_T22WEV_20190918T201931 | 18-Sep-19 | S2 | 24.1 |
| S2A_MSIL1C_20190918T150011_N0208_R125_T22WFV_20190918T201931 | 18-Sep-19 | S2 | 98.3 |
| S2B_MSIL1C_20190923T150009_N0208_R125_T22WEV_20190923T200537 | 23-Sep-19 | S2 | 21.1 |
| S2B_MSIL1C_20190923T150009_N0208_R125_T22WFV_20190923T200537 | 23-Sep-19 | S2 | 26.7 |
| S2B_MSIL1C_20190926T150949_N0208_R025_T22WEV_20190926T184849 | 26-Sep-19 | S2 | 0.5  |
| S2B_MSIL1C_20190926T150949_N0208_R025_T22WFV_20190926T184849 | 26-Sep-19 | S2 | 0.0  |
| S2A_MSIL1C_20190928T150011_N0208_R125_T22WEV_20190928T165931 | 28-Sep-19 | S2 | 0.0  |
| S2A_MSIL1C_20190928T150011_N0208_R125_T22WFV_20190928T165931 | 28-Sep-19 | S2 | 18.8 |

Table S2: extent of manual editing of meltwater feature shapefiles in 2018 and 2019 datasets detailing number and area of features added and removed.

|                   | Features<br>Removed | Features<br>Added | Area Removed<br>(m <sup>2</sup> ) | Area Added<br>(m <sup>2</sup> ) |
|-------------------|---------------------|-------------------|-----------------------------------|---------------------------------|
| 15 June<br>2018   | 3340                | 8                 | 2030013                           | 2453440                         |
| 13 July<br>2018   | 2469                | 9                 | 1829722                           | 6901536                         |
| 19 August<br>2018 | 1942                | 0                 | 809828                            | 0                               |
| 22 May<br>2019    | 1624                | 1                 | 845160                            | 85300                           |
| 20 June<br>2019   | 3399                | 2                 | 42607801                          | 3925164                         |
| 25 July<br>2019   | 20161               | 2                 | 7326493                           | 161847                          |
| 17 August<br>2019 | 870                 | 1                 | 1095242                           | 1039581                         |

## Text S1: Sensor resolution

An evaluation between meltwater feature areas derived from L8 and S2 images was done to determine if sensor resolution impacts lake detection. Individual lake area values of overlapping lake polygons, derived from L8 and S2 images from 8th June, 3 July and 29 August 2019, were compared. There was a strongly significant relationship between both lake area datasets throughout the season. There were no overlapping S2 and L8 images in the 2018 melt season to compare. Although S2 has been observed to detect meltwater at the boundaries of indistinguishable lakes more accurately than L8 (i.e. Arthur et al., 2020a), here it can be concluded that sensor resolution does not have a significant impact on meltwater detection or lake area, and both sensors can be used in conjunction.

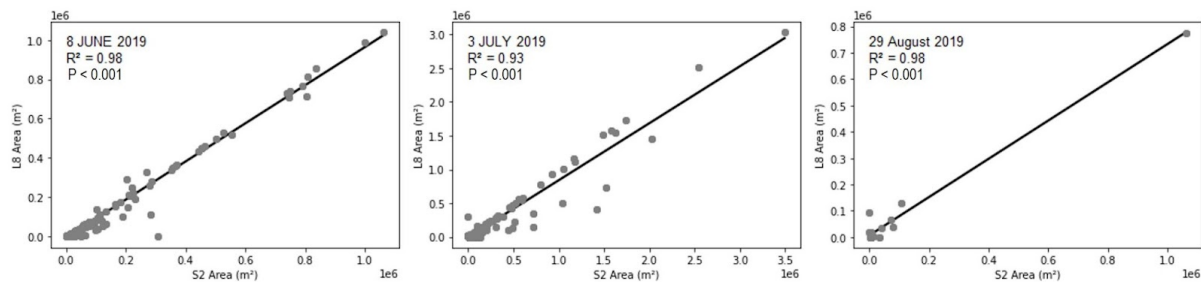

Figure S1: Lake area frequency distribution from three overlapping Landsat 8 and Sentinel 2 scenes throughout the 2019 melt season.

## Text S2: Partitioning of lake drainage events

We use the 2019 dataset to highlight the influence of the time-scale of rapid and slow drainage events. A lake was determined to drain rapidly if  $> 80\%$  of its volume was removed over between 1-5 days and a slowly draining lake was identified when it lost 20% of its volume over any time period. The proportion of rapid drainage events changes when the time stamp changes, highlighting how the number of drainage days used to determine a rapid drainage event can alter results considerably, especially seen between 3 days and 4 days. The typical time that previous studies use to determine a rapid drainage event is 4 days.

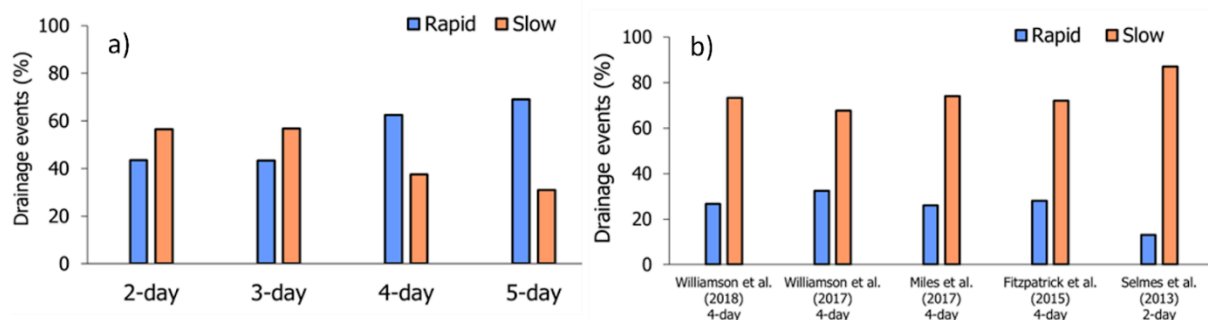

Figure S2: Partitioning of lake drainage events. a) percentage of rapid and slow drainage events in 2019 and number of days determining rapid drainage b) frequency of rapid and slow drainage events in previous SW Greenland studies.

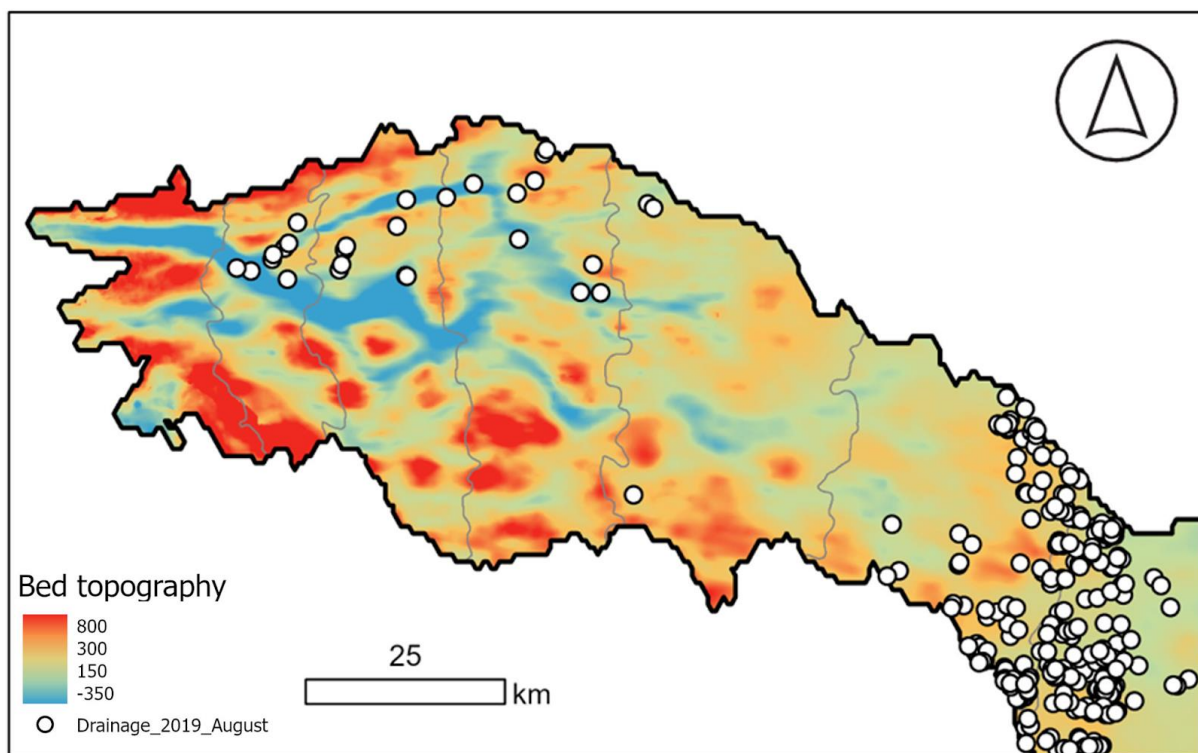

Figure S3: Drainage within the Russell/Leverett glacier catchment on 2 August 2019. Red to blue gradient represents bedrock topography in metres.
